# Supplementary material for: Elevated low-density lipoprotein cholesterol levels and prostate cancer risk: UK Biobank evidence
Source: Research Square preprint supplement (doi:10.21203/rs.3.rs-8025728/v1), 2025-11-25
Supplement: Supplementary file [file 9d4d79d166252b80522a227b.pdf]

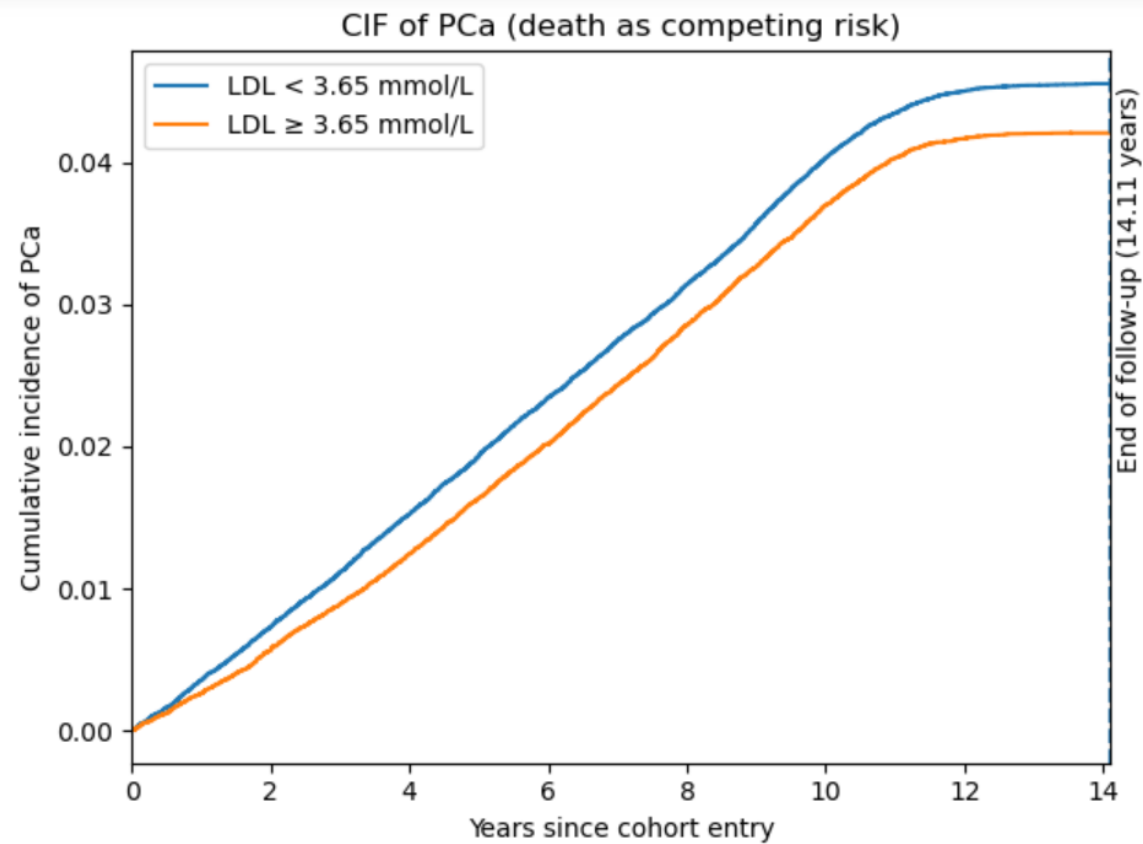

| LDL group     | Time (years) | CIF (absolute risk) | SE       | 95% CI lower | 95% CI upper |
|---------------|--------------|---------------------|----------|--------------|--------------|
| < 3.65 mmol/L | 5            | 0,019354            | 0,000381 | 0,018607     | 0,0201       |
| < 3.65 mmol/L | 10           | 0,040335            | 0,000544 | 0,039269     | 0,041401     |
| ≥ 3.65 mmol/L | 5            | 0,01638             | 0,000441 | 0,015517     | 0,017243     |
| ≥ 3.65 mmol/L | 10           | 0,036988            | 0,000655 | 0,035704     | 0,038271     |

Online resource 7. Cumulative incidence function (CIF) curves for prostate cancer (PCa) stratified by baseline LDL levels (< 3.65 vs. ≥ 3.65 mmol/L), accounting for death as a competing risk with 14.1 years of follow-up and absolute risk of PCa at 5 and 10 years, estimated using CIF with standard errors (SE) and 95% confidence intervals for participants with LDL < 3.65 mmol/L and ≥ 3.65 mmol/L
