# Supplementary material for: Elevated low-density lipoprotein cholesterol levels and prostate cancer risk: UK Biobank evidence
Source: Research Square preprint supplement (doi:10.21203/rs.3.rs-8025728/v1), 2025-11-25
Supplement: Supplementary file [file 70c9a736cf8850208f46c8db.pdf]

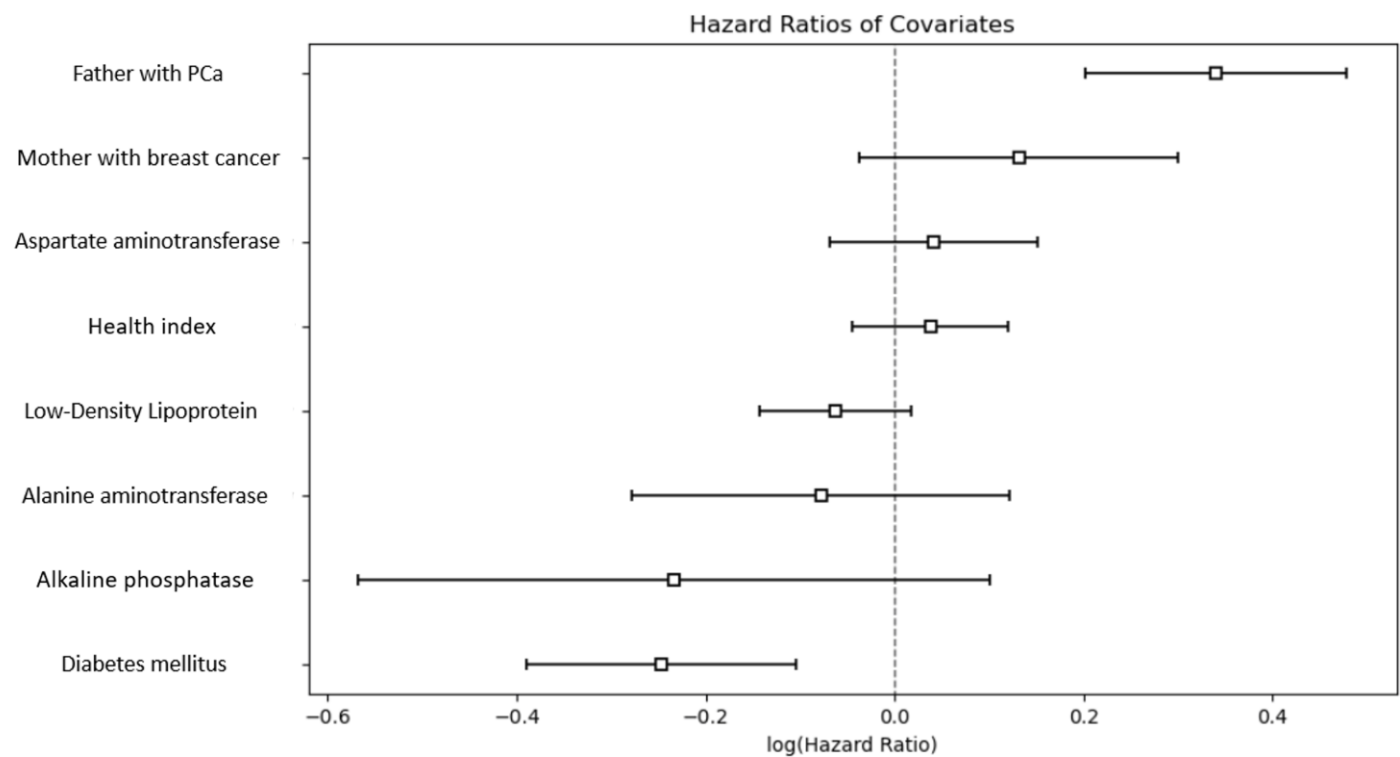

| variable_name                    | coef  | exp(coef) | se(coef) | coef_lower_95% | coef_upper_95% | exp_coef_lower_95% | exp_coef_upper_95% | z     | p        | -log2(p) |
|----------------------------------|-------|-----------|----------|----------------|----------------|--------------------|--------------------|-------|----------|----------|
| Father with Pca                  | 0,34  | 1,41      | 0,07     | 0,20           | 0,48           | 1,22               | 1,61               | 4,82  | 0,000001 | 19,43    |
| Mother with breast cancer        | 0,13  | 1,14      | 0,09     | -0,04          | 0,30           | 0,96               | 1,35               | 1,53  | 0,125892 | 2,99     |
| AST (Aspartate aminotransferase) | 0,04  | 1,04      | 0,06     | -0,07          | 0,15           | 0,93               | 1,16               | 0,73  | 0,462452 | 1,11     |
| Health index                     | 0,04  | 1,04      | 0,04     | -0,05          | 0,12           | 0,96               | 1,13               | 0,89  | 0,373504 | 1,42     |
| Low-density Lipoprotein          | -0,06 | 0,94      | 0,04     | -0,14          | 0,02           | 0,87               | 1,02               | -1,54 | 0,124458 | 3,01     |
| ALT (Alanine aminotransferase)   | -0,08 | 0,92      | 0,10     | -0,28          | 0,12           | 0,76               | 1,13               | -0,77 | 0,441577 | 1,18     |
| ALP (Alkaline phosphatase)       | -0,23 | 0,79      | 0,17     | -0,57          | 0,10           | 0,57               | 1,11               | -1,37 | 0,170398 | 2,55     |
| Diabetes mellitus                | -0,25 | 0,78      | 0,07     | -0,39          | -0,10          | 0,68               | 0,90               | -3,38 | 0,000717 | 10,45    |

Online resource 6. Cox regression modell after matching 1:5 (cohort 1 and cohort 4) for BMI, age and ethnicity
